# Supplementary material for: Partitioning into ER membrane microdomains impacts autophagic protein turnover during cellular aging
Source: PubMed Central journal article supplement (PMC11176346; doi:10.1038/s41598-024-64493-8), 2024-06-13
Supplement: 41598_2024_64493_MOESM1_ESM.pdf [file 41598_2024_64493_MOESM1_ESM.pdf]

## **Supplementary Material**

### **Partitioning into ER membrane microdomains impacts autophagic protein turnover during cellular aging**

Simon Prokisch<sup>1</sup> and Sabrina Büttner<sup>1,#</sup>

<sup>1</sup>Department of Molecular Biosciences, The Wenner-Gren Institute, Stockholm University, 10691 Stockholm, Sweden

# Correspondence:

Sabrina Büttner, [sabrina.buettner@su.se](mailto:sabrina.buettner@su.se)

Including:

Supplementary Figures S1-S5

Supplementary Tables S1 and S2

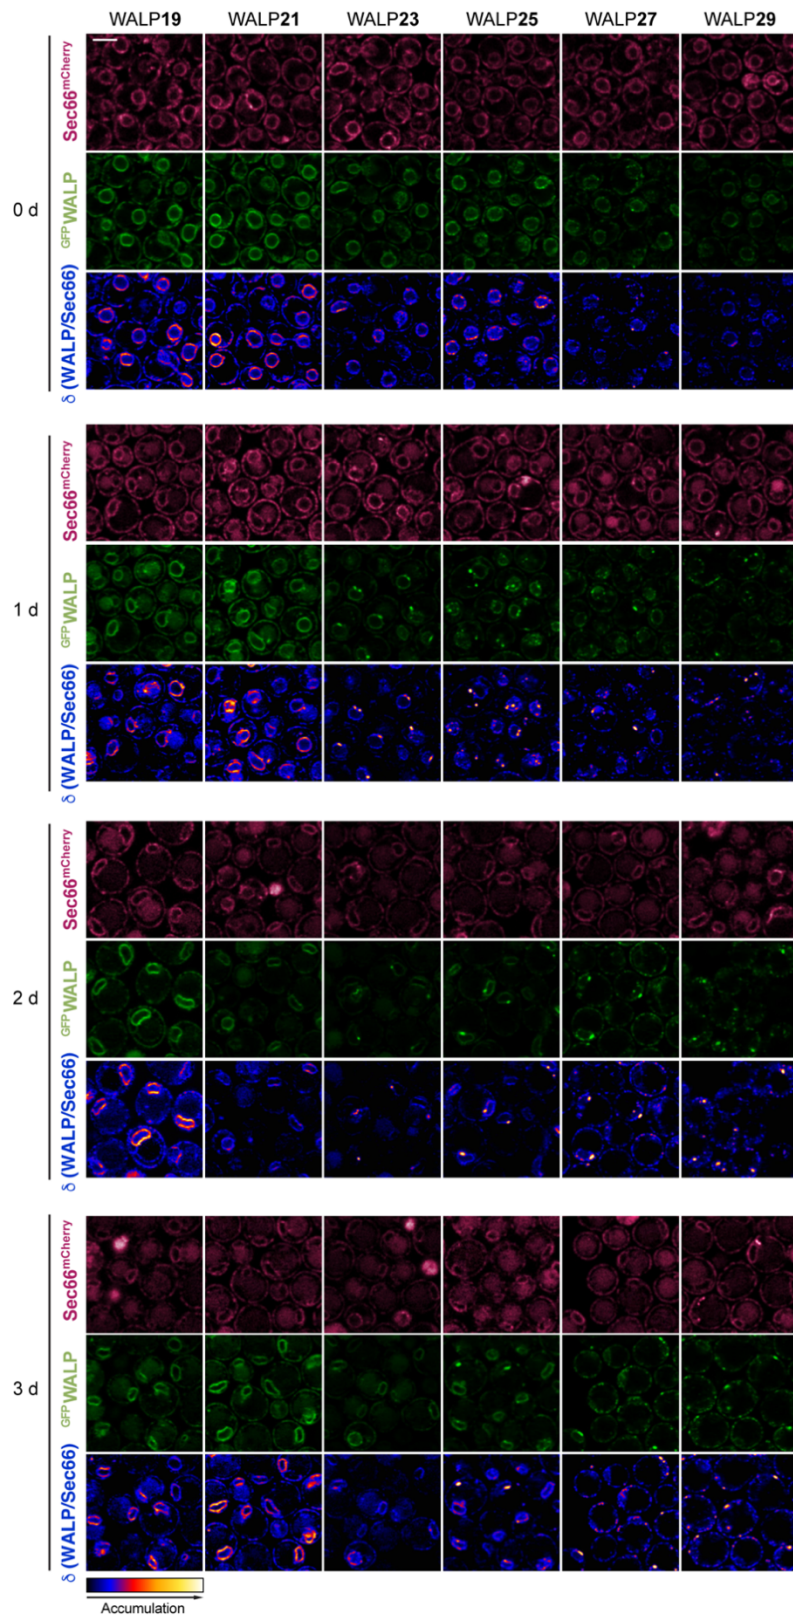

**Supplementary Figure S1: Age-dependent reorganization of ER membrane microdomains.**

Micrographs of cells endogenously expressing Sec66<sup>mCherry</sup> as a reference protein and each of the GFP-WALPs to visualize ER membranes thickness in young, growing cells (day 0; corresponding to mid-exponential growth phase) and at different time points during cellular aging. The ratio of GFP-WALP to Sec66<sup>mCherry</sup> visualizes the ER membrane regions with specific GFP-WALP accumulation. Scale bar: 3 μm.

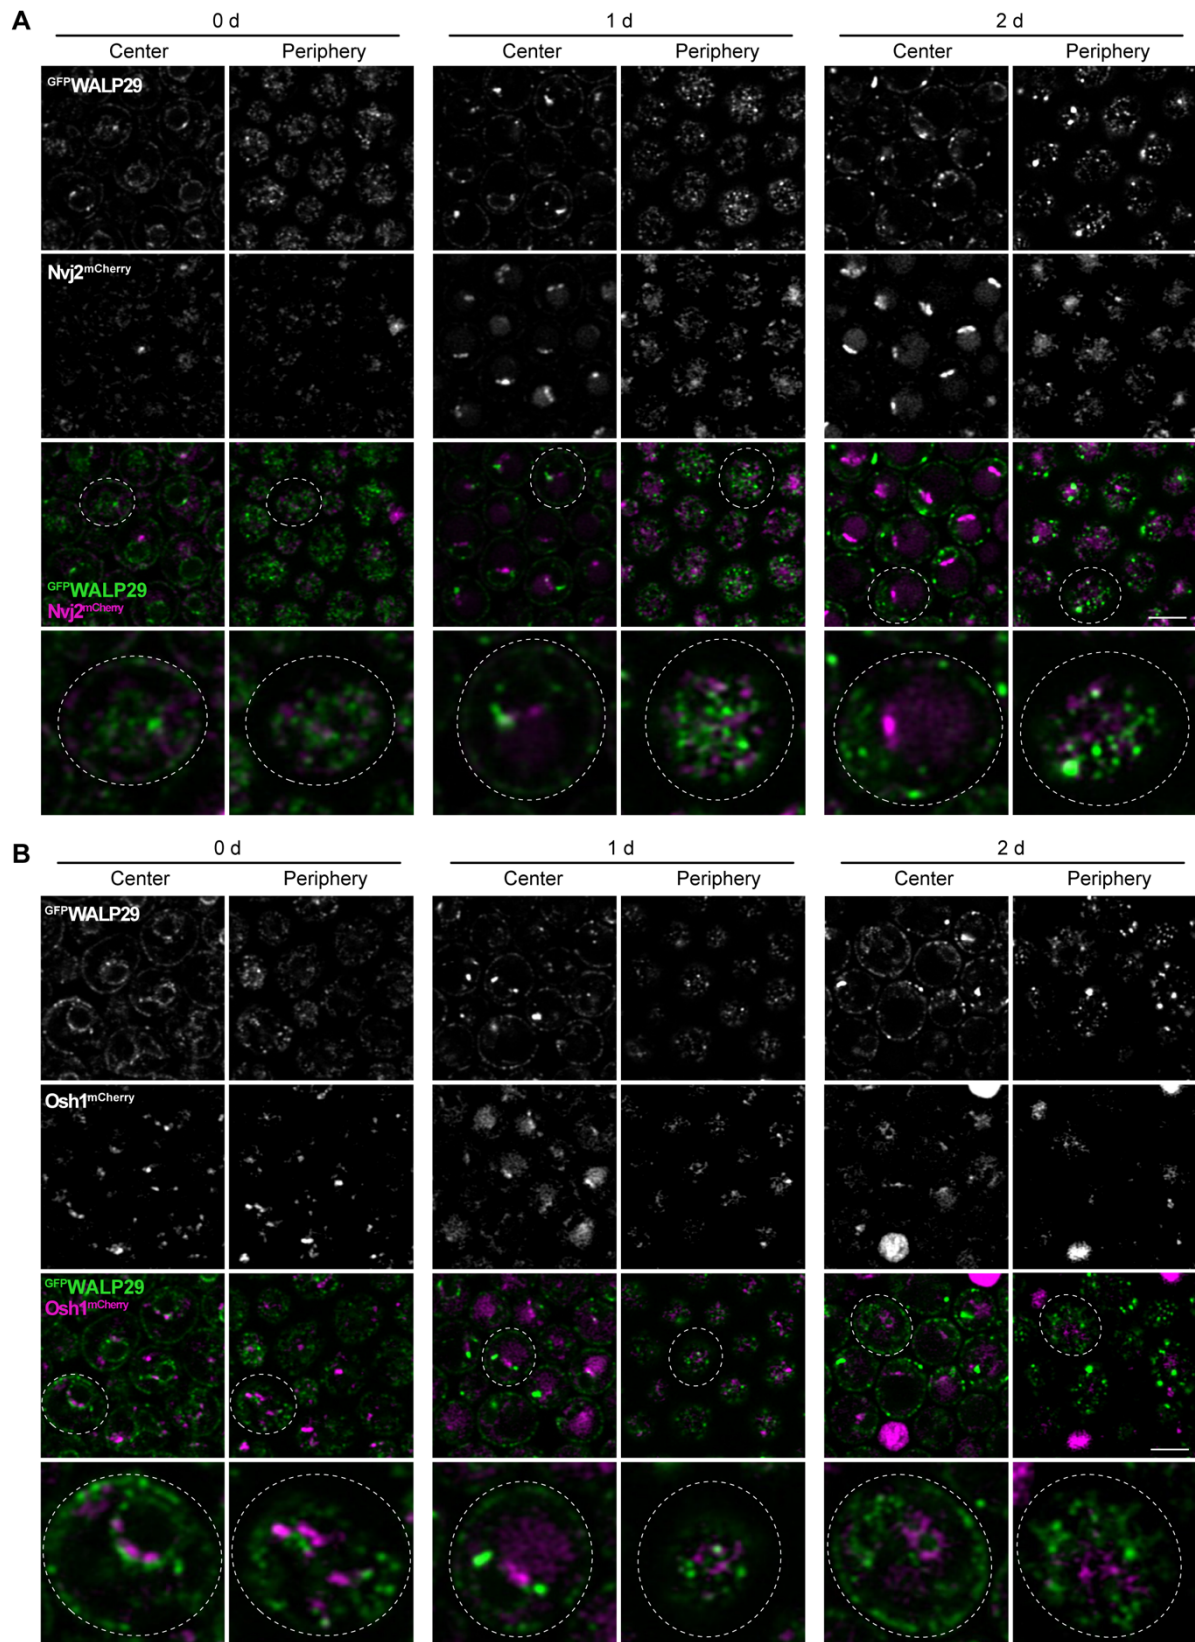

**Supplementary Figure S2: Only a small number of WALP29-decorated microdomains form proximal to ER-Golgi contact sites in aging cells.**

**(A, B)** Confocal micrographs of cells endogenously expressing GFP-WALP29 and Nvj2<sup>mCherry</sup> (A) or Osh1<sup>mCherry</sup> (B) at indicated time points. A central plane and a peripheral plane of the same cells are shown. Scale bars: 3  $\mu$ m.

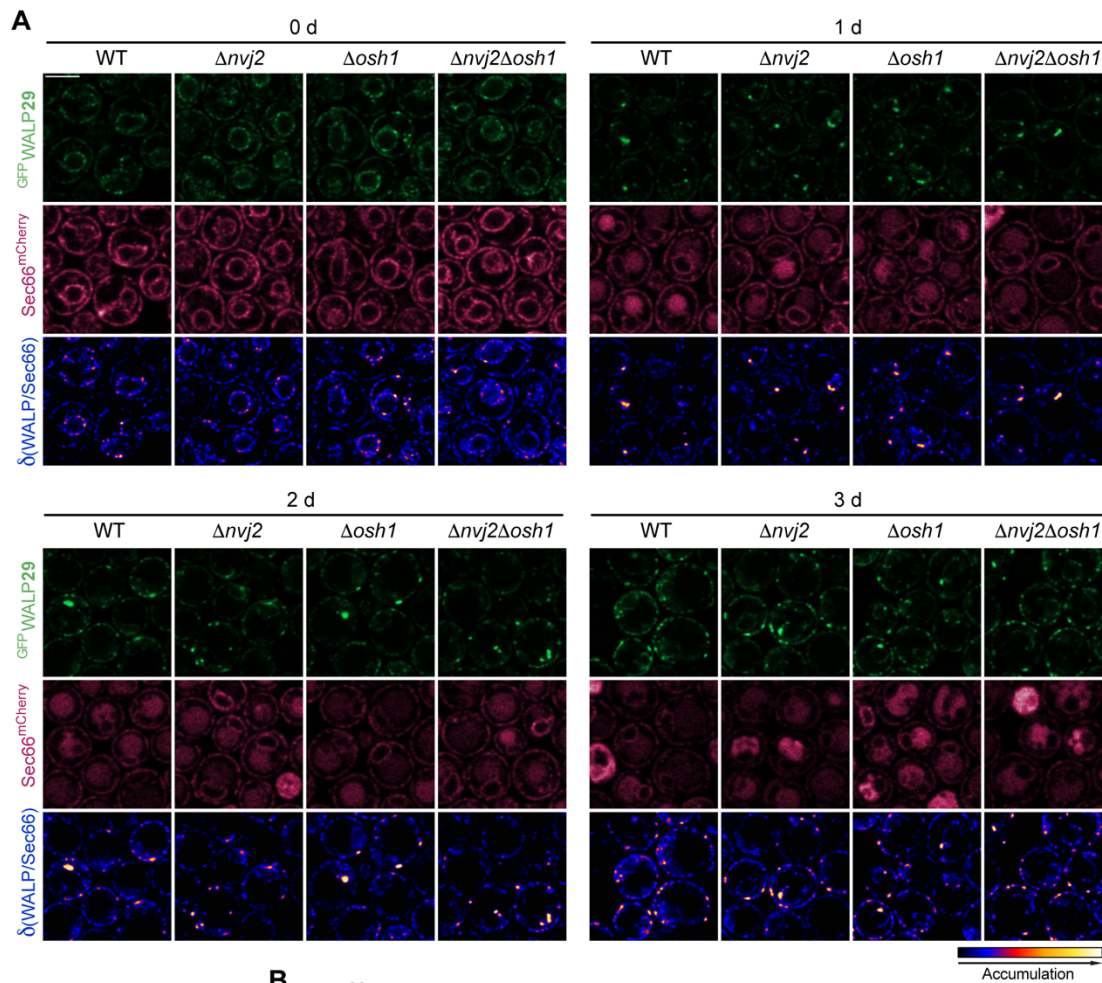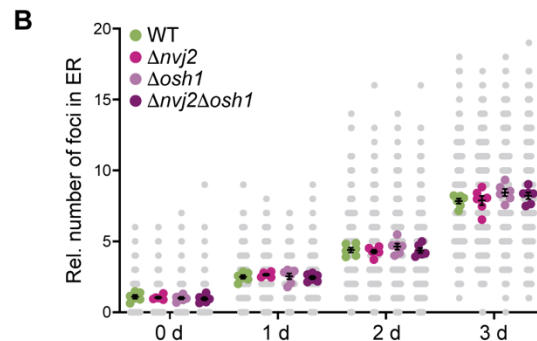

**Supplementary Figure S3: Impaired ER-Golgi contact formation via genetic ablation of Nvj2 and Osh1 does not impact the frequency of WALP29-decorated microdomains.**

**(A)** Micrographs of wild type (WT),  $\Delta nvj2$ ,  $\Delta osh1$ , and  $\Delta nvj2\Delta osh1$  cells endogenously expressing Sce66<sup>mCherry</sup> as a reference protein and GFP<sup>WALP29</sup> to visualize microdomains of increased bilayer thickness in young, growing cells (0 d) and at different time points during cellular aging. Scale bars: 3  $\mu$ m. **(B)** Quantification of the frequency of WALP29-decorated ER microdomains from confocal micrographs as shown in (A). Gray dots represent individual cells from six independent experiments. Colored dots represent the average for each individual experiment (with 20-46 cells per n), and lines represent the grand mean  $\pm$  s.e.m. of the individual experiments (n = 6).

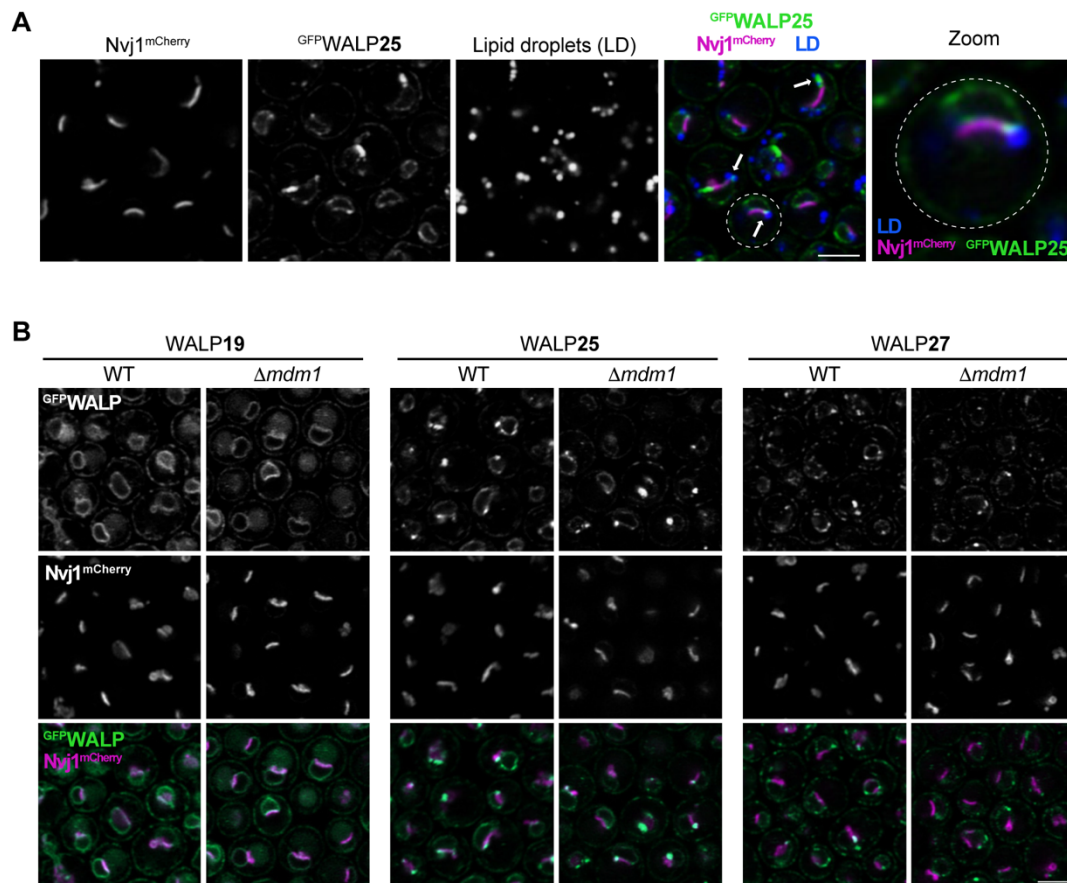

**Supplementary Figure S4: Formation of WALP-decorated foci at the rim of the NVJs does not require NVJ-associated lipid droplet clustering.**

**(A)** Micrographs of cells endogenously expressing  $Nvj1^{mCherry}$  and  $GFPWALP25$ , stained with monodansylpentane to visualize lipid droplets (LD) after the diauxic shift (day 1). **(B)** Micrographs of wild type (WT) cells and cells lacking the NVJ- and LD-associated protein Mdm1 ( $\Delta mdm1$ ), endogenously expressing  $Nvj1^{mCherry}$  and  $GFPWALP19$ ,  $GFPWALP25$  or  $GFPWALP27$ , after the diauxic shift (day 1). Scale bars: 3  $\mu m$ .

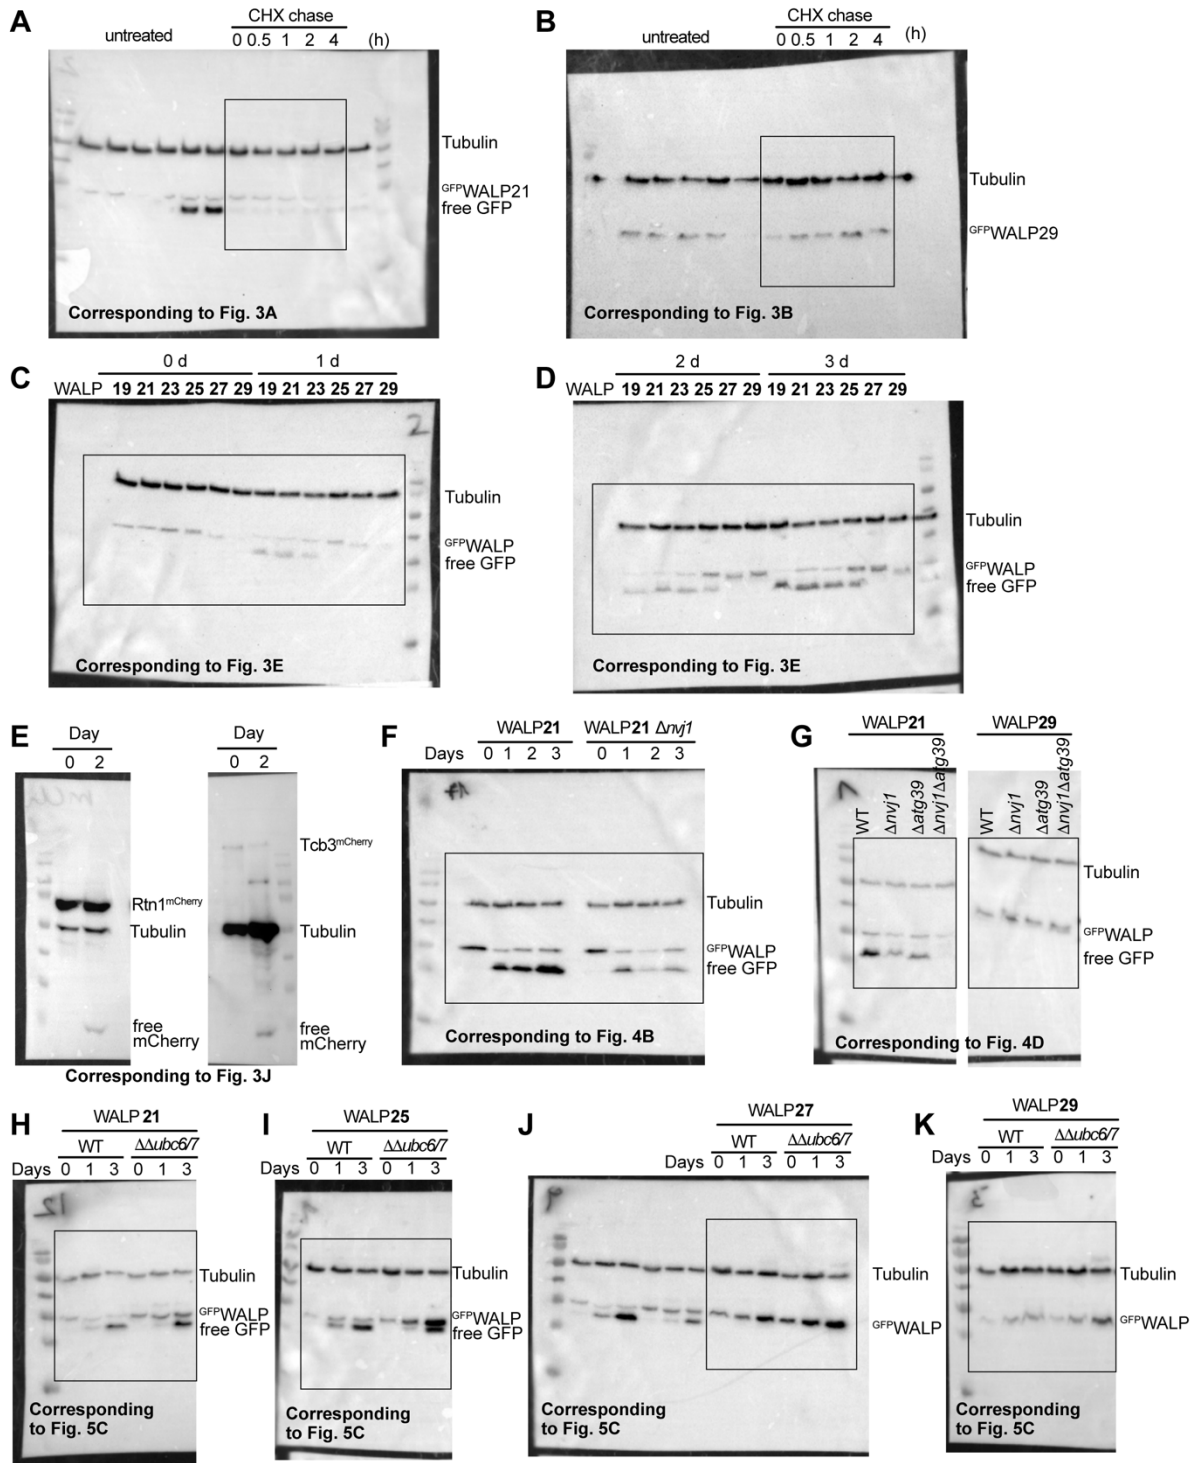

**Supplementary Figure S5: Full length immunoblots shown in this study.**

(A-K) Unprocessed, full length immunoblots corresponding to the cropped immunoblots shown in Figure 3 (A-E), in Figure 4 (F, G) and Figure 5 (H-K). Blots have been probed with antibodies directed against the GFP-epitope, the mCherry-epitope and tubulin as loading control as indicated.

**Supplementary Table S1: Yeast strains used in this study.**

| Strain                                                            | Genotype                                                                                                   | Source                      |
|-------------------------------------------------------------------|------------------------------------------------------------------------------------------------------------|-----------------------------|
| WT (BY4741)                                                       | MATa, <i>his3Δ1</i> , <i>leu2Δ0</i> , <i>met15Δ0</i> , <i>ura3Δ0</i>                                       | Euroscarf                   |
| WT <sup>GFP</sup> WALP19                                          | BY4741 <i>GFP-WALP19::His3MX</i>                                                                           | Prasad <i>et al.</i> , 2020 |
| WT <sup>GFP</sup> WALP21                                          | BY4741 <i>GFP-WALP21::His3MX</i>                                                                           | Prasad <i>et al.</i> , 2020 |
| WT <sup>GFP</sup> WALP23                                          | BY4741 <i>GFP-WALP23::His3MX</i>                                                                           | Prasad <i>et al.</i> , 2020 |
| WT <sup>GFP</sup> WALP25                                          | BY4741 <i>GFP-WALP25::His3MX</i>                                                                           | Prasad <i>et al.</i> , 2020 |
| WT <sup>GFP</sup> WALP27                                          | BY4741 <i>GFP-WALP27::His3MX</i>                                                                           | Prasad <i>et al.</i> , 2020 |
| WT <sup>GFP</sup> WALP29                                          | BY4741 <i>GFP-WALP29::His3MX</i>                                                                           | Prasad <i>et al.</i> , 2020 |
| WT <sup>GFP</sup> WALP19 Sec66 <sup>mCherry</sup>                 | BY4741 <i>GFP-WALP19::His3MX</i> , <i>SEC66-mCherry::kanMX</i>                                             | This study                  |
| WT <sup>GFP</sup> WALP21 Sec66 <sup>mCherry</sup>                 | BY4741 <i>GFP-WALP21::His3MX</i> , <i>SEC66-mCherry::kanMX</i>                                             | This study                  |
| WT <sup>GFP</sup> WALP23 Sec66 <sup>mCherry</sup>                 | BY4741 <i>GFP-WALP23::His3MX</i> , <i>SEC66-mCherry::kanMX</i>                                             | This study                  |
| WT <sup>GFP</sup> WALP25 Sec66 <sup>mCherry</sup>                 | BY4741 <i>GFP-WALP25::His3MX</i> , <i>SEC66-mCherry::kanMX</i>                                             | This study                  |
| WT <sup>GFP</sup> WALP27 Sec66 <sup>mCherry</sup>                 | BY4741 <i>GFP-WALP27::His3MX</i> , <i>SEC66-mCherry::kanMX</i>                                             | This study                  |
| WT <sup>GFP</sup> WALP29 Sec66 <sup>mCherry</sup>                 | BY4741 <i>GFP-WALP29::His3MX</i> , <i>SEC66-mCherry::kanMX</i>                                             | This study                  |
| WT <sup>GFP</sup> WALP19 Nvj1 <sup>mCherry</sup>                  | BY4741 <i>GFP-WALP19::His3MX</i> , <i>NVJ1-mCherry::kanMX</i>                                              | This study                  |
| WT <sup>GFP</sup> WALP21 Nvj1 <sup>mCherry</sup>                  | BY4741 <i>GFP-WALP21::His3MX</i> , <i>NVJ1-mCherry::kanMX</i>                                              | This study                  |
| WT <sup>GFP</sup> WALP23 Nvj1 <sup>mCherry</sup>                  | BY4741 <i>GFP-WALP23::His3MX</i> , <i>NVJ1-mCherry::kanMX</i>                                              | This study                  |
| WT <sup>GFP</sup> WALP25 Nvj1 <sup>mCherry</sup>                  | BY4741 <i>GFP-WALP25::His3MX</i> , <i>NVJ1-mCherry::kanMX</i>                                              | This study                  |
| WT <sup>GFP</sup> WALP27 Nvj1 <sup>mCherry</sup>                  | BY4741 <i>GFP-WALP27::His3MX</i> , <i>NVJ1-mCherry::kanMX</i>                                              | This study                  |
| WT <sup>GFP</sup> WALP29 Nvj1 <sup>mCherry</sup>                  | BY4741 <i>GFP-WALP29::His3MX</i> , <i>NVJ1-mCherry::kanMX</i>                                              | This study                  |
| Δ <i>nvj1</i> <sup>GFP</sup> WALP21                               | BY4741 <i>GFP-WALP21::His3MX</i> , <i>nvj1Δ::hphNT1</i>                                                    | This study                  |
| Δ <i>nvj1</i> <sup>GFP</sup> WALP29                               | BY4741 <i>GFP-WALP29::His3MX</i> , <i>nvj1Δ::hphNT1</i>                                                    | This study                  |
| Δ <i>nvj1Δatg39</i> <sup>GFP</sup> WALP21                         | BY4741 <i>GFP-WALP21::His3MX</i> , <i>nvj1Δ::hphNT1</i> , <i>atg39Δ::kanMX</i>                             | This study                  |
| Δ <i>nvj1Δatg39</i> <sup>GFP</sup> WALP29                         | BY4741 <i>GFP-WALP29::His3MX</i> , <i>nvj1Δ::hphNT1</i> , <i>atg39Δ::kanMX</i>                             | This study                  |
| Δ <i>atg39</i> <sup>GFP</sup> WALP21                              | BY4741 <i>GFP-WALP21::His3MX</i> , <i>atg39Δ::kanMX</i>                                                    | This study                  |
| Δ <i>atg39</i> <sup>GFP</sup> WALP29                              | BY4741 <i>GFP-WALP29::His3MX</i> , <i>atg39Δ::kanMX</i>                                                    | This study                  |
| ΔΔ <i>ubc6/7</i> <sup>GFP</sup> WALP21                            | BY4741 <i>GFP-WALP21::His3MX</i> , <i>ubc6Δ::hphNT1</i> , <i>ubc7Δ::kanMX</i>                              | This study                  |
| ΔΔ <i>ubc6/7</i> <sup>GFP</sup> WALP25                            | BY4741 <i>GFP-WALP25::His3MX</i> , <i>ubc6Δ::hphNT1</i> , <i>ubc7Δ::kanMX</i>                              | This study                  |
| ΔΔ <i>ubc6/7</i> <sup>GFP</sup> WALP27                            | BY4741 <i>GFP-WALP27::His3MX</i> , <i>ubc6Δ::hphNT1</i> , <i>ubc7Δ::kanMX</i>                              | This study                  |
| ΔΔ <i>ubc6/7</i> <sup>GFP</sup> WALP29                            | BY4741 <i>GFP-WALP29::His3MX</i> , <i>ubc6Δ::hphNT1</i> , <i>ubc7Δ::kanMX</i>                              | This study                  |
| WT <sup>GFP</sup> WALP29 Nvj2 <sup>mCherry</sup>                  | BY4741 <i>GFP-WALP29::His3MX</i> , <i>NVJ2-mCherry::kanMX</i>                                              | This study                  |
| WT <sup>GFP</sup> WALP29 Osh1 <sup>mCherry</sup>                  | BY4741 <i>GFP-WALP29::His3MX</i> , <i>OSH1-mCherry::kanMX</i>                                              | This study                  |
| WT <sup>GFP</sup> WALP29 Rtn1 <sup>mCherry</sup>                  | BY4741 <i>GFP-WALP29::His3MX</i> , <i>RTN1-mCherry::kanMX</i>                                              | This study                  |
| WT <sup>GFP</sup> WALP29 Tcb3 <sup>mCherry</sup>                  | BY4741 <i>GFP-WALP29::His3MX</i> , <i>TCB3-mCherry::kanMX</i>                                              | This study                  |
| Δ <i>mdm1</i> <sup>GFP</sup> WALP19                               | BY4741 <i>GFP-WALP19::His3MX</i> , <i>mdm1Δ::hphNT1</i>                                                    | This study                  |
| Δ <i>mdm1</i> <sup>GFP</sup> WALP25                               | BY4741 <i>GFP-WALP25::His3MX</i> , <i>mdm1Δ::hphNT1</i>                                                    | This study                  |
| Δ <i>mdm1</i> <sup>GFP</sup> WALP27                               | BY4741 <i>GFP-WALP27::His3MX</i> , <i>mdm1Δ::hphNT1</i>                                                    | This study                  |
| Δ <i>osh1</i> <sup>GFP</sup> WALP29 Sec66 <sup>mCherry</sup>      | BY4741 <i>GFP-WALP29::His3MX</i> , <i>osh1Δ::LEU2</i> , <i>SEC66-mCherry::kanMX</i>                        | This study                  |
| Δ <i>nvj2</i> <sup>GFP</sup> WALP29 Sec66 <sup>mCherry</sup>      | BY4741 <i>GFP-WALP29::His3MX</i> , <i>nvj2Δ::natNT2</i> , <i>SEC66-mCherry::kanMX</i>                      | This study                  |
| Δ <i>nvj2Δosh1</i> <sup>GFP</sup> WALP29 Sec66 <sup>mCherry</sup> | BY4741 <i>GFP-WALP29::His3MX</i> , <i>nvj2Δ::natNT2</i> , <i>osh1Δ::LEU2</i> , <i>SEC66-mCherry::kanMX</i> | This study                  |

**Supplementary Table S2: Oligonucleotides used in this study.**

| Modification            | Primer   | Oligonucleotide (5'-3')                                                        | Template                                                                             |
|-------------------------|----------|--------------------------------------------------------------------------------|--------------------------------------------------------------------------------------|
| Tagging of <i>SEC66</i> | Sec66 S2 | AACACTGAACGAGCGAATACATATCTTTGCACACAGTA<br>GGCACTAATCGATGAATTCGAGCTCG           | pSB89; pYM-C<br>(kanMX) mCherry<br>linker from pYM25<br>(Janke <i>et al.</i> , 2004) |
|                         | Sec66 S3 | AAAGAGTGGGAGCTGAAAATAAATAATGATGGAAGA<br>TTAGTCAATCGTACGCTGCAGGTCGAC            |                                                                                      |
|                         | Control  | AGTGACGTTATGGATGGTAG                                                           |                                                                                      |
| Tagging of <i>NVJ1</i>  | Nvj1 S2  | CTCGTTGTAAGTGACGATGATAACCGAGATGACGGAA<br>ATATAGTACATTAATCGATGAATTCGAGCTCG      | pSB89; pYM-C<br>(kanMX) mCherry<br>linker from pYM25<br>(Janke <i>et al.</i> , 2004) |
|                         | Nvj1 S3  | CTAGATGCACAAGTGAACACTGAACAAGCATACTCTCA<br>ACCATTTAGATACCGACGCTGCAGGTCGAC       |                                                                                      |
|                         | Control  | CTATTGACCACATAATCCTTAG                                                         |                                                                                      |
| Tagging of <i>NVJ2</i>  | Nvj2 S2  | GCATATAGCTTCAAGTGATATTTATTTATTTTAAATATA<br>GTACCGTGGACTCAATCGATGAATTCGAGCTCG   | pSB89; pYM-C<br>(kanMX) mCherry<br>linker from pYM25<br>(Janke <i>et al.</i> , 2004) |
|                         | Nvj2 S3  | CGGCTTTTCAAGCAAGATTTAGAATTTGAAGAACAGC<br>GAGAGCCCAAACGCTACGCTGCAGGTCGAC        |                                                                                      |
|                         | Control  | ATATTCACACTGTACTAGAT                                                           |                                                                                      |
| Tagging of <i>OSH1</i>  | Osh1 S2  | AATGGATACAAATGAACGAGTGTTATTGTGACTACATT<br>GCACAGCTTAATCGATGAATTCGAGCTCG        | pSB89; pYM-C<br>(kanMX) mCherry<br>linker from pYM25<br>(Janke <i>et al.</i> , 2004) |
|                         | Osh1 S3  | GTATTGGAACAAAAGAAAAAATCATGACTTTAAAGAT<br>TGTGCTGATATTTCCGTACGCTGCAGGTCGAC      |                                                                                      |
|                         | Control  | GTATCGGCTTTGAATCCATG                                                           |                                                                                      |
| Tagging of <i>TCB3</i>  | Tcb3 S2  | CACACCAAATGTGCCCTTATTGAGCGTATAAAAGAATA<br>GTTTTCACTGTTTATTAATCGATGAATTCGAGCTCG | pSB89; pYM-C<br>(kanMX) mCherry<br>linker from pYM25<br>(Janke <i>et al.</i> , 2004) |
|                         | Tcb3 S3  | CAAGAATGGTCAGGTACTCCCGTGCCAGAAGTTCCTC<br>AAGAATACACGCAGCGTACGCTGCAGGTCGAC      |                                                                                      |
|                         | Control  | CCACTGGTGGTTAAAGAAAG                                                           |                                                                                      |
| Tagging of <i>RTN1</i>  | Rtn1 S2  | GAGACAAAAGTTAGCTATTCTTGTTGAAATGAAAAA<br>AAAAAGCACTCAATCGATGAATTCGAGCTCG        | pSB89; pYM-C<br>(kanMX) mCherry<br>linker from pYM25<br>(Janke <i>et al.</i> , 2004) |
|                         | Rtn1 S3  | GAAGAAAAGTACAAAAAATTGCAAAATGAATTGGAA<br>AAAAACAACGCTCGTACGCTGCAGGTCGAC         |                                                                                      |
|                         | Control  | CAGTCATCTCGAGCAAAATCCC                                                         |                                                                                      |
| Deletion of <i>NVJ1</i> | Nvj1 S1  | TGTGCATAATATCAAAAAAGCTACAAATATAATTGTAA<br>AATATAATAAGCATGCGTACGCTGCAGGTCGAC    | pFA6a-hphNT1 (Janke<br><i>et al.</i> , 2004)                                         |
|                         | Nvj1 S2  | CTCGTTGTAAGTGACGATGATAACCGAGATGACGGAA<br>ATATAGTACATTAATCGATGAATTCGAGCTCG      |                                                                                      |
|                         | Control  | CTATTGACCACATAATCCTTAG                                                         |                                                                                      |



|                          |          |                                                                                 |                                              |
|--------------------------|----------|---------------------------------------------------------------------------------|----------------------------------------------|
|                          | Atg39 S1 | GCAAGTGCAGATAATAGAGACTAGTAAAACAGTCGAGT<br>TGTCGGACCTAAAATGCGTACGCTGCAGGTCGAC    |                                              |
| Deletion of <i>ATG39</i> | Atg39 S2 | CGTTTTTTTTTTCTTTTGTTAATTTTCATTCTTCATGCTGG<br>GTTTTGGATGATCTAATCGATGAATTCGAGCTCG | pFA6a-kanMX (Bähler<br><i>et al.</i> , 1998) |
|                          | Control  | GCTGCATATTTGCTTCGCCG                                                            |                                              |
|                          | Ubc6 S1  | ACCGCATTGCAAATTGCAAACAAAGTACGTACAATA<br>GTAATGCGTACGCTGCAGGTCGAC                |                                              |
| Deletion of <i>UBC6</i>  | Ubc6 S2  | GTGTTGTCAAATTTATCTAAAGTTTAGTTCATTTAATG<br>GTTCAATCGATGAATTCGAGCTCG              | pFA6a-hphNT1 (Janke<br><i>et al.</i> , 2004) |
|                          | Control  | ACCCTAGCGCCAATGCAAGA                                                            |                                              |
|                          | Ubc7 S1  | GGAACTTCCCTAGTAATAGTGTAATTTGGAAGGGCAT<br>AGCATGCGTACGCTGCAGGTCGAC               |                                              |
| Deletion of <i>UBC7</i>  | Ubc7 S2  | GTTAAAAGGAAGACCAATGATCATTAACTGCTACCT<br>GCTTTCAATCGATGAATTCGAGCTCG              | pFA6a-kanMX (Bähler<br><i>et al.</i> , 1998) |
|                          | Control  | CCAAAGATTTCCATAATGAT                                                            |                                              |
|                          | Nvj2 S1  | ACACATCGAAGAGCAGAACAGCAAGAGAAAAGTAGC<br>ATTAAGACCATAATGCGTACGCTGCAGGTCGAC       |                                              |
| Deletion of <i>NVJ2</i>  | Nvj2 S2  | GCATATAGCTTCAAGTGATATTTATTTATTTTAAATATA<br>GTACCGTGGACTCAATCGATGAATTCGAGCTCG    | pFA6a-natNT2 (Janke<br><i>et al.</i> , 2004) |
|                          | Control  | GTTCAATGTAGTAATGATG                                                             |                                              |
|                          | Mdm1 S1  | GAAAGCGCCATAAGTGCGCGTGTGGTGCCTTCTGATA<br>TGATATCGTATGCGTACGCTGCAGGTCGAC         |                                              |
| Deletion of <i>MDM1</i>  | Mdm1 S2  | CAATTACACTTTTTTTTTTAGATTGTTTCGGTACTTAGTC<br>AAGTTTTATTTTCAATCGATGAATTCGAGCTCG   | pFA6a-hphNT1 (Janke<br><i>et al.</i> , 2004) |
|                          | Control  | CGTCAAGGGTATCAGCAGAG                                                            |                                              |
|                          | Osh1 S1  | TAAAAGGGAAAAGTTTAAACATCAAAGTACACCTTTC<br>ACCCCTCCACACCATGCGTACGCTGCAGGTCGAC     |                                              |
| Deletion of <i>OSH1</i>  | Osh1 S2  | AATGGATACAAATGAACGAGTGTTATTGTGACTACATT<br>GCACAGCTTAATCGATGAATTCGAGCTCG         | pFA6a-LEU2 (this<br>study)                   |
|                          | Control  | GTATCGGCTTTGAATCCATG                                                            |                                              |

## References

Bähler, J. *et al.* Heterologous modules for efficient and versatile PCR-based gene targeting in *Schizosaccharomyces pombe*. *Yeast* **10**, 943-51 (1998)

Janke, C. *et al.* A versatile toolbox for PCR-based tagging of yeast genes: new fluorescent proteins, more markers and promoter substitution cassettes. *Yeast* **21**, 947–962 (2004).

Prasad, R., Sliwa-Gonzalez, A. & Barral, Y. Mapping bilayer thickness in the ER membrane. *Sci Adv* **6**, eaba5130 (2020).
